# Supplementary material
Source: MDPI journal article supplement (https://www.mdpi.com/2075-1702/11/1/34)
Supplement: s1 [file s1]

Archive with 2 entries (2 files):
- D1_Semi-structured interview script – study I.pdf
- D2_Semi-structured interview script – study II.pdf
