# Supplementary material
Source: MDPI journal article supplement (https://www.mdpi.com/2075-1702/11/1/34)
Supplement: s1 [file s1 › D1_Semi-structured interview script – study I.pdf]

# Semi-Structured Interview Script

- for participants **without** robot experience -

Before starting the interviews, the interviewers and the RoMi-project are introduced.

Subsequently, the procedure of the interview is briefly explained.

This is followed by an introduction to the topic of "robots" in various areas of society such as logistics, public space, industry and healthcare, as well as their possible applications, in order to develop a common understanding of the topic.

## Daily structure of routine activities of healthcare professionals

1. First, we would like you to briefly tell us about your working hours. Do you work full-time or part-time? And what shifts do you work (early, late, night, weekend shifts)?
2. Please describe one of your typical workdays (related to your early shift/late shift/night shift...) starting from the moment you enter the nursing home.
3. What are generally your main duties in the nursing home?

**Routine activities for which assistance is desired (categorized by: activities that must be performed by a qualified health care professional, activities that do not necessarily require a qualified health care professional, and all other day-to-day activities)**

4. What are tasks that you currently perform that would
  - a. not necessarily need to be performed by a qualified caregiver? And would you like assistance with such activities?
  - b. necessarily need to be performed by a qualified caregiver? And would you like assistance with such activities?
5. Regardless of your professional qualifications, are there any tasks that are particularly physically and/or mentally demanding for you?

**Possible areas of application for robotics as well as related functional and design requirements (referring to question 4 and 5)**

6. Could you imagine that a robot could support you in the activities just mentioned? Or in which of the activities mentioned do you see a suitable opportunity for the use of robots?
7. What exactly might the sequence of these tasks look like if the robot were to perform them?
8. What problems do you see when the robot performs such tasks?

**Requirements for the design and functionalities of a robot with respect to the target group of people in need of care**

9. What should a robot necessarily be capable of when dealing with people in need of care?
10. What would be no-go's in dealing with care recipients that the robot should not do under any circumstances? Could you imagine the robot interacting with care recipients on its own, without another caregiver?
11. When you think about the people you care for, how would you assess their attitude toward new technologies and especially a robot?  
If your assessment is negative, do you think it is possible that they would get used to such a device?
12. When you think about the people you care for, what could be the biggest advantage of using robots for them?

# Semi-Structured Interview Script

- for participants **with** robot experience -

Before starting the interviews, the interviewers and the RoMi-project are introduced.

Subsequently, the procedure of the interview is briefly explained.

This is followed by an introduction to the topic of "robots" in various areas of society such as logistics, public space, industry and healthcare, as well as their possible applications, in order to develop a common understanding of the topic.

## Introduction and use of the robot in the nursing home

1. Please tell us briefly how the robot came to your nursing home.
2. For which tasks was the robot used in your nursing home?
3. Please describe to us in what way you are/were involved in the use of the robot (related to: system initialization, system maintenance, system recovery).

## Impression of the robot use

4. Thinking about the use of the robot at your nursing home, what did you/your colleagues particularly like about it? In terms of:
  - Completion of tasks
  - Relief in everyday work/tasks
  - Emotional stress relief
  - Relevance to care
5. Thinking about the use of the robot in your nursing home, what did you/your colleagues not like at all? In terms of:
  - Problems in completing tasks
  - Insufficient relief in daily work/tasks
  - Emotional stress
  - Irrelevance to care
6. How do you think the residents of your nursing home perceive/perceived the use of the robot? What influence did the use have on:
  - Mood/well-being/confidence
  - Togetherness/communication/interaction
  - Daily activities
  - Interest
7. What wishes would you have for the developers of the robot?

**Routine activities for which assistance is desired (categorized by: activities that must be performed by a qualified health care professional, activities that do not necessarily require a qualified health care professional, and all other day-to-day activities)**

8. What are tasks that you currently perform that would
  - a. not necessarily need to be performed by a qualified caregiver? And would you like assistance with such activities?
  - b. necessarily need to be performed by a qualified caregiver? And would you like assistance with such activities?
9. Regardless of your areas of responsibility, what other tasks do you think the robot could be used for?

**Possible areas of application for robotics as well as related functional and design requirements (referring to question 8 and 9)**

10. Could you imagine that a robot could support you in the activities just mentioned? Or in which of the activities mentioned do you see a suitable opportunity for the use of robots?
11. What exactly might the sequence of these tasks look like if the robot were to perform them?
12. What problems do you see when the robot performs such tasks?

**Requirements for the design and functionalities of a robot with respect to the target group of people in need of care**

13. What should a robot necessarily be capable of when dealing with people in need of care?
14. What would be no-go's in dealing with care recipients that the robot should not do under any circumstances? Could you imagine the robot interacting with care recipients on its own, without another caregiver?

**Ideal human-robot collaboration**

15. To conclude today's interview, we would like to ask you to describe your ideal vision of the collaboration between caregivers and robots.
